# Supplementary material for: Gene Expression Analysis of Immune Regulatory Genes in Circulating Tumour Cells and Peripheral Blood Mononuclear Cells in Patients with Colorectal Carcinoma
Source: MDPI journal article supplement (doi:10.3390/ijms24055051), 2023-03-06
Supplement: s1 [file s1]

**Table S1.** Primer sequences of selected genes.

| Primer Name            | Sequence (5'-3')         |
|------------------------|--------------------------|
| p53 Forward            | ACCTATGGAAACTACTTCCTG    |
| p53 Reverse            | ACCATTGTTCAATATCGTCC     |
| APC Forward            | AGAGGTCATCTCAGAACAAG     |
| APC Reverse            | CATGTTGATTTCTCCCACTC     |
| KRAS Forward           | GGCCTGCTGAAAATGACTG      |
| KRAS Reverse           | CTTGCTTCCTGTAGGAATCCTC   |
| c-MYC Forward          | TGAGGAGGAACAAGAAGATG     |
| c-MYC Reverse          | ATCCAGACTCTGCCTTTTG      |
| PDCD-L1 Forward        | GTGGCATCCAAGATACAAACTCAA |
| PDCD-L1 Reverse        | TCCTTCCTCTTGTCACGCTCA    |
| CTLA-4 Forward         | TTGCTAAAGAAAAGAAGCCC     |
| CTLA-4 Reverse         | AAAGTTAGAATTGCCTCAGC     |
| CD47 Forward           | GGCAATGACGAAGGAGGTT      |
| CD47 Reverse           | ATCCGGTGGTATGGATGAGA     |
| PTPRC Forward          | CTGGATTGACTACAGCAAAG     |
| PTPRC Reverse          | GGAAGTATTGTCTGGACTAAG    |
| $\beta$ -actin Forward | GACGACATGGAGAAAATCTG     |
| $\beta$ -actin Reverse | ATGATCTGGGTCATCTTCTC     |
